# Supplementary material
Source: publisher figshare collection journal article supplement (https://acs.figshare.com/ndownloader/files/5534096)
Supplement: Supplementary file 1 [file 5534096]

Compound_ID	SMILES	eqBuChE % RA at 10 µM ± SEM	eqBuChE IC50 ± SEM (µM)	huBuChE IC50 ± SEM (µM)	EeAChE % RA at 10 µM ± SEM	huAChE IC50 ± SEM (µM)
1	CC1=CC(C)=NN1CC(O)CN(CC2=CC=CO2)CC3=NC4=CC=CC=C4N3	6.33 ± 0.88	-	-	2.32 ± 1.11	-
2	OC(CC1)(C2=CC(C)=CC=C2)CCN1CC3=C(C4=CC=CS4)NC5=C3C=CC=N5	16.2 ± 1.00	48.9 ± 3.9	-	2.14 ± 1.10	-
3	O=C(C1CC1)C2=CN(CC(NCCC3=CNC4=C3C=CC=C4)=O)C5=CC=CC=C52	7.28 ± 0.39	-	-	3.44 ± 0.08	-
4	COC1=C(NC(CN2C(C3=CC=CC=C3)=CC=C2CCC(O)=O)=O)C=CC=C1	5.54 ± 1.15	-	-	2.20 ± 0.91	-
5	CC1=C(C)C=C(N=C(C2CCCN2C(C3CC(O)CN3CC4=CC=CC=C4)=O)N5)C5=C1	17.5 ± 0.69	46.8 ± 2.9	-	No inhibition	-
6	FC1=CC2=C(C=C1)NC=C2C(CN3CCN(C4=CC=CC=C4)CC3)O	1.31 ± 0.25	-	-	2.69 ± 1.29	-
7	CC1=C(C(OCCOC)=O)C(C2=CC(C3=C(C=CC=C3)N4CC)=C4C=C2)C5=C(CCCC5=O)N1	52.7 ± 2.34	9.72 ± 0.79	-	1.35 ± 0.15	-
8	CC1=C(C(C)=NN1C2=C(C)C=CC=C2)CN(CCN(C)C)CC3=NC=CC=C3	31.9 ± 1.39	19.2 ± 0.3	-	2.46 ± 0.40	-
9	OC(CN1C(SCCCC)=NC2=C1C(NC(N2C)=O)=O)COC3=CC=CC4=C3C=CC=C4	3.69 ± 0.24	-	-	5.34 ± 1.26	-
10	FC1=C(NC(CN(C)S(=O)(C2=CC=C(C=CC=C3)C3=C2)=O)=O)C=CC=C1	5.64 ± 0.24	-	-	3.43 ± 0.91	-
11	O=C(C(N1CCN(C(OCC)=O)CC1)CC2=O)N2C3=CC=CC4=CC=CC=C43	1.85 ± 0.31	-	-	4.93 ± 0.21	-
12	FC1=CC=CC=C1NC(CSC2C(N(C3=CC=CC=C3)C(C2)=O)=O)=O	6.01 ± 0.38	-	-	0.48 ± 0.21	-
13	OC(C(CC1=CNC2=C1C=CC=C2)NC3=NC=NC4=C3OC5=C4C=CC=C5)=O	7.18 ± 0.33	-	-	1.45 ± 0.30	-
14	CC1=C(C(OCCCC)=O)C(C2=CC(C3=C(C=CC=C3)N4CC)=C4C=C2)C5=C(CCCC5=O)N1	53.7 ± 1.4	-	-	-	-
15	CC1=C(C(OCCSCC)=O)C(C2=CC(C3=C(C=CC=C3)N4CC)=C4C=C2)C5=C(CCCC5=O)N1	51.2 ± 1.6	-	-	-	-
16	CC1=C(C(OCC2OCCC2)=O)C(C3=CC(C4=C(C=CC=C4)N5CC)=C5C=C3)C6=C(CCCC6=O)N1	84.2 ± 4.2	0.763 ± 0.023	0.443 ± 0.038	1.73 ± 0.10	No inhibition
17	CC1=C(C(OC)=O)C(C2=CC(C3=C(C=CC=C3)N4CC)=C4C=C2)C5=C(CCCC5=O)N1	49.5 ± 9.5	-	-	-	-
18	CC1=C(C(OC(C)CC)=O)C(C2=CC(C3=C(C=CC=C3)N4CC)=C4C=C2)C5=C(CC(C)(C)CC5=O)N1	no inhibition	-	-	-	-
19	CC1=C(C(OCCOCC)=O)C(C2=CC(C3=C(C=CC=C3)N4CC)=C4C=C2)C5=C(CC(C)(C)CC5=O)N1	2.49 ± 1.42	-	-	-	-
20	CC1=C(C(OC2CCCC2)=O)C(C3=CC(C4=C(C=CC=C4)N5CC)=C5C=C3)C6=C(CC(C)(C)CC6=O)N1	2.53 ± 1.13	-	-	-	-
